# Supplementary material for: Genome-Wide Characterization of B-Box Gene Family in Salvia miltiorrhiza
Source: MDPI journal article supplement (doi:10.3390/ijms24032146), 2023-01-21

**Figure S2:** Results of TMHMM transmembrane structure analysis of *Salvia miltiorrhiza* BBX gene family.

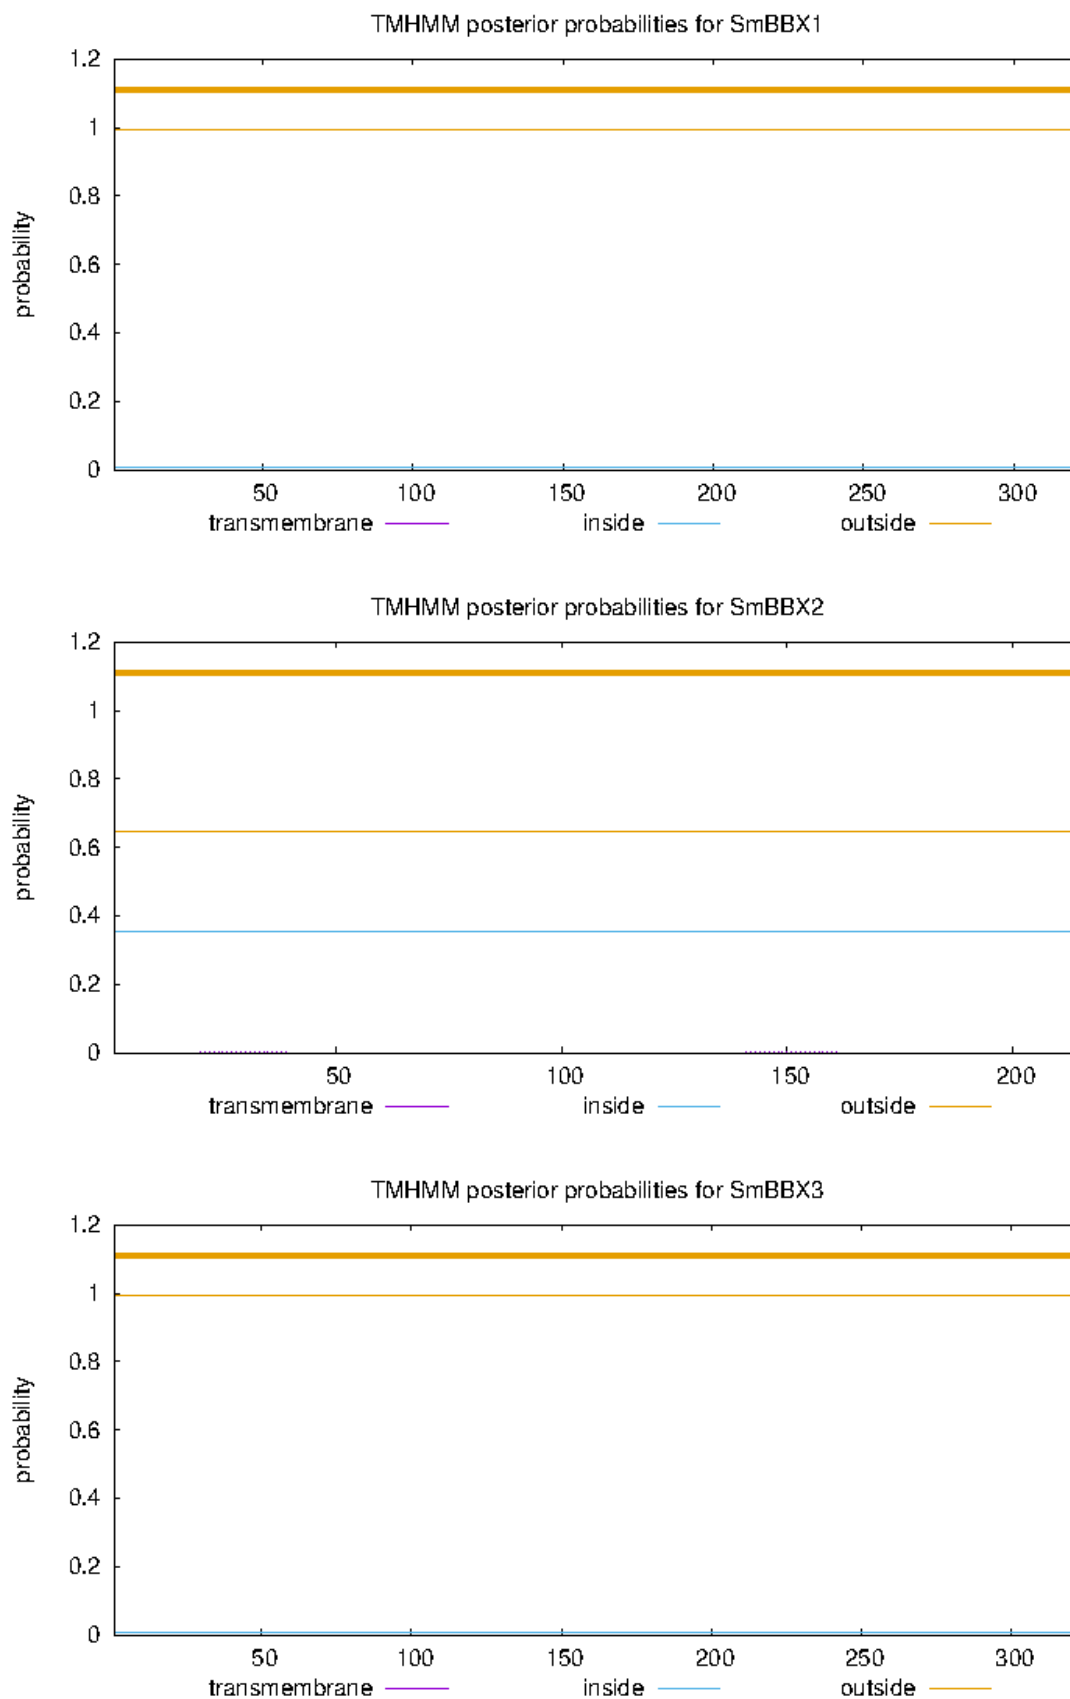

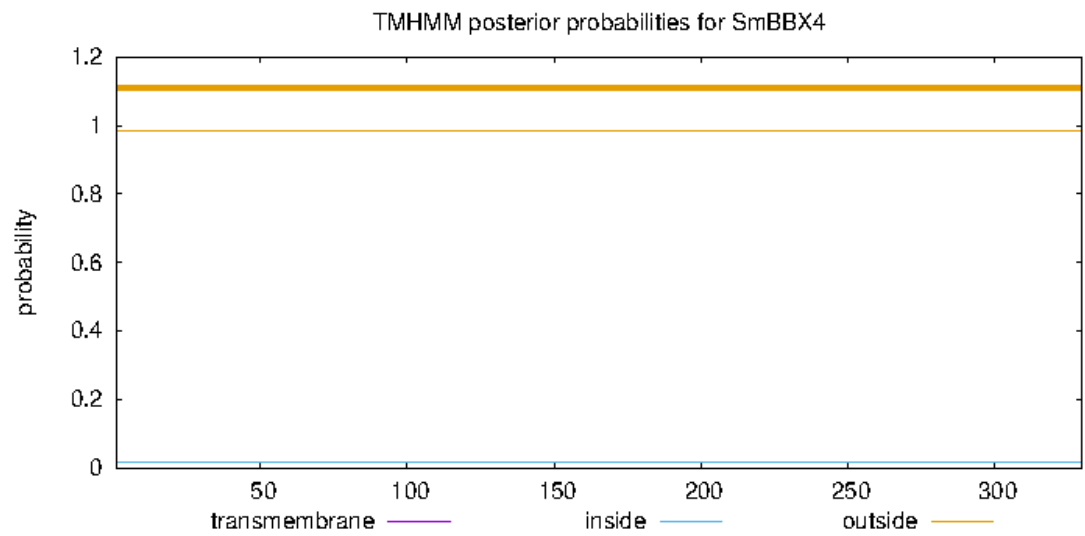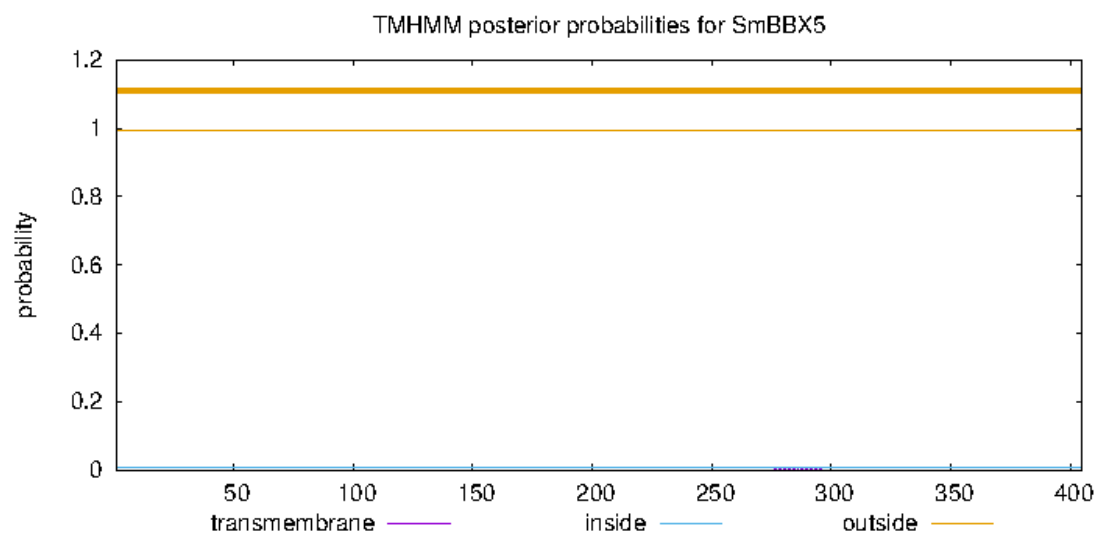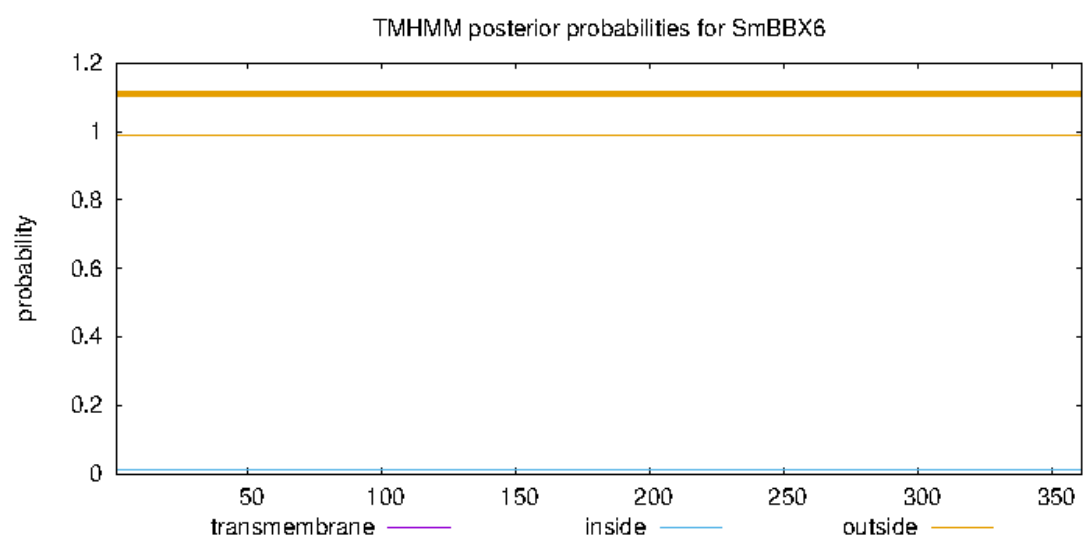

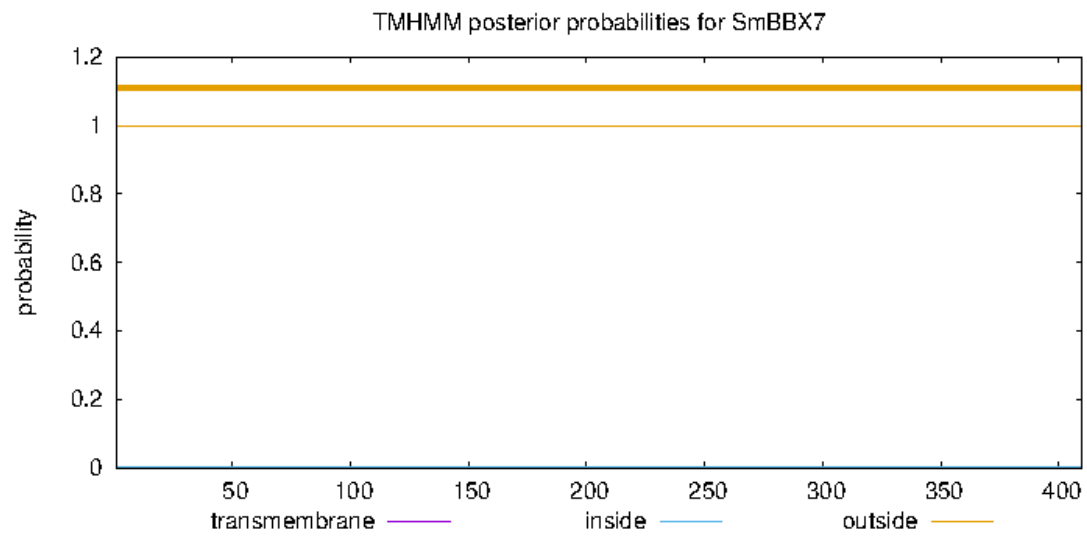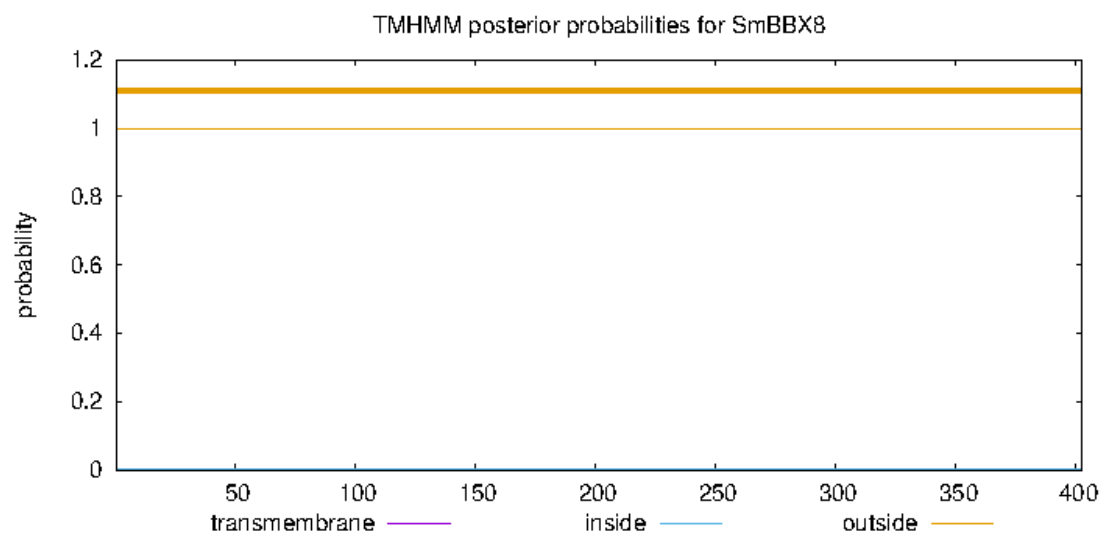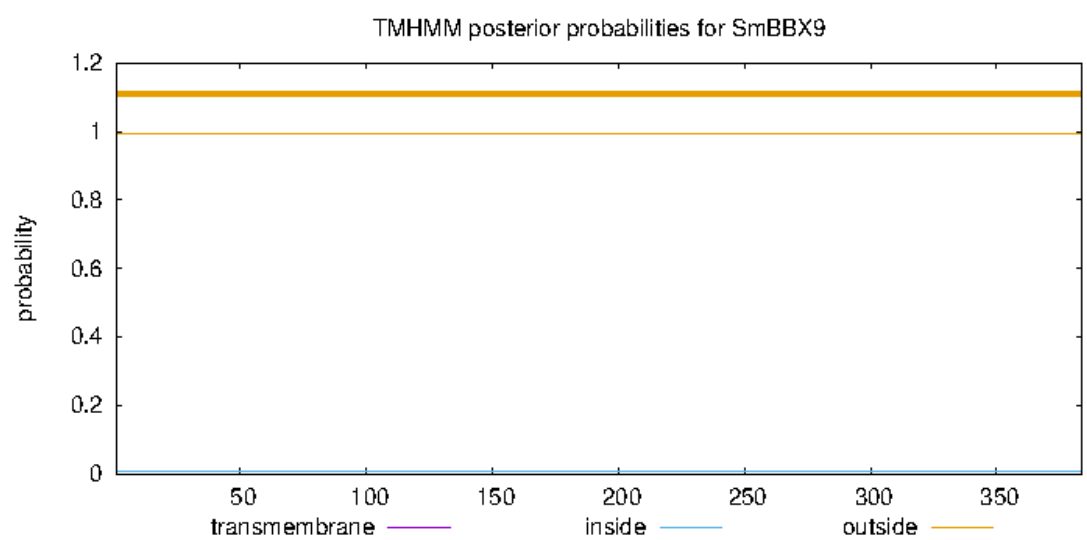

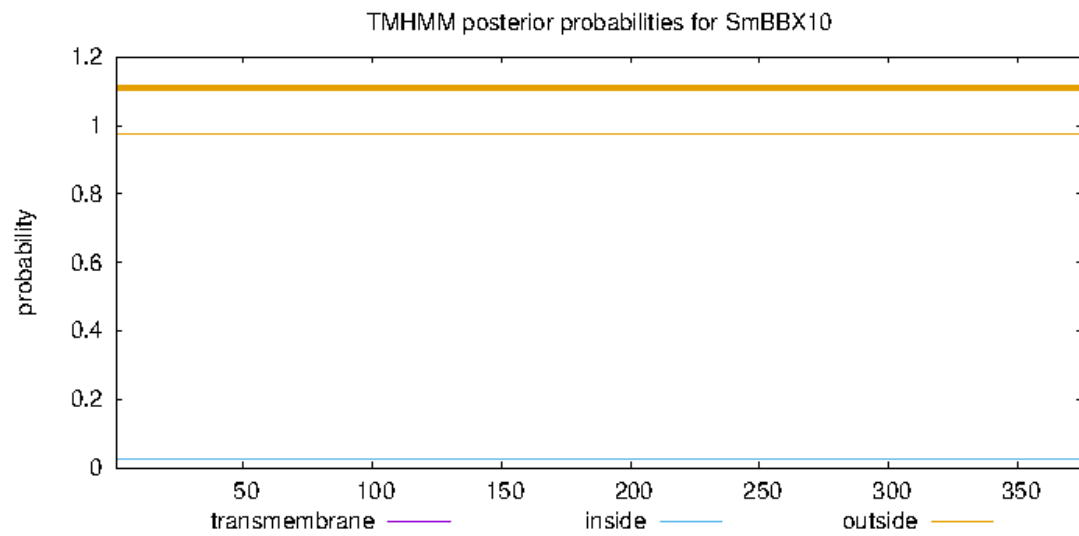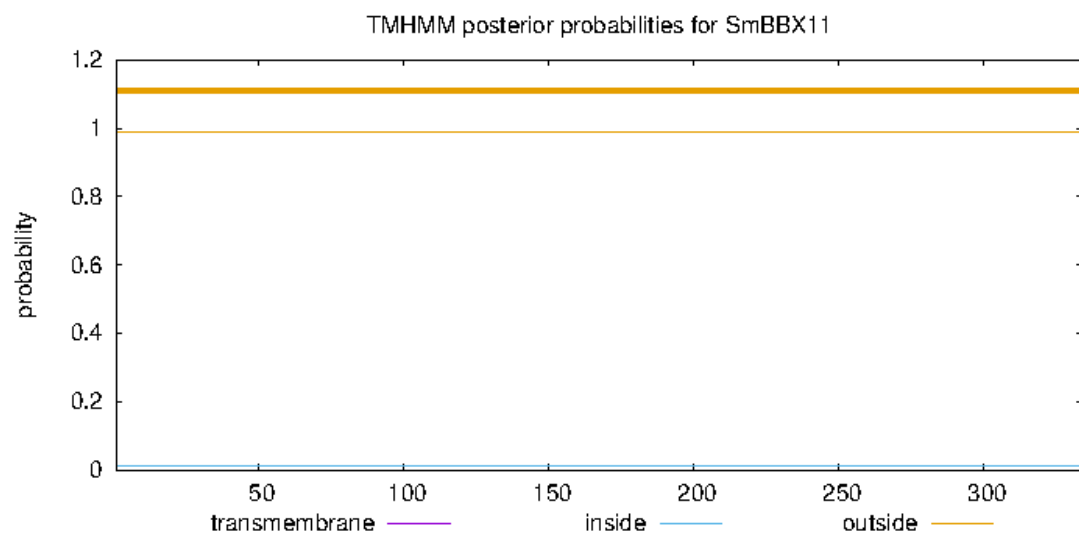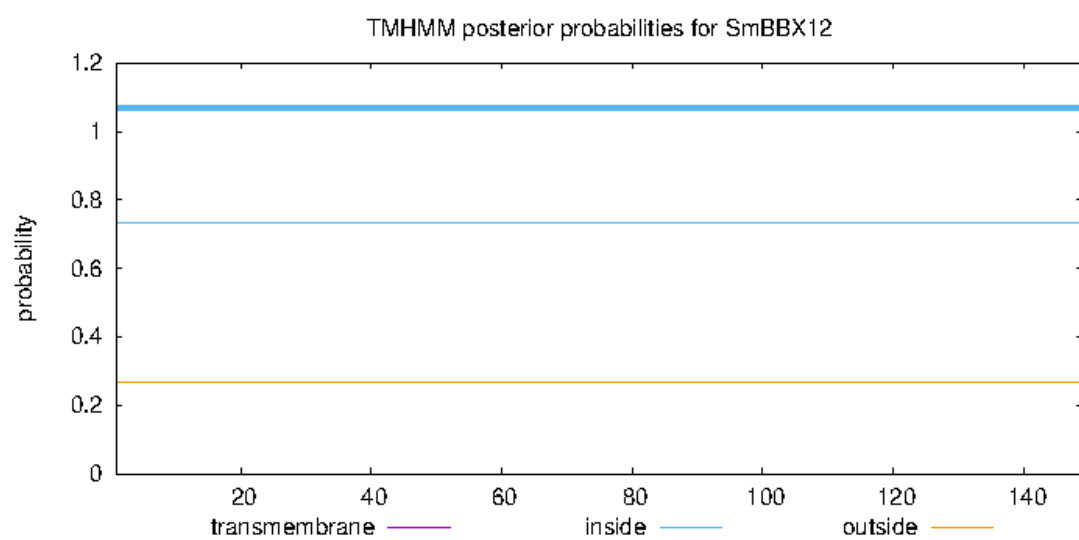

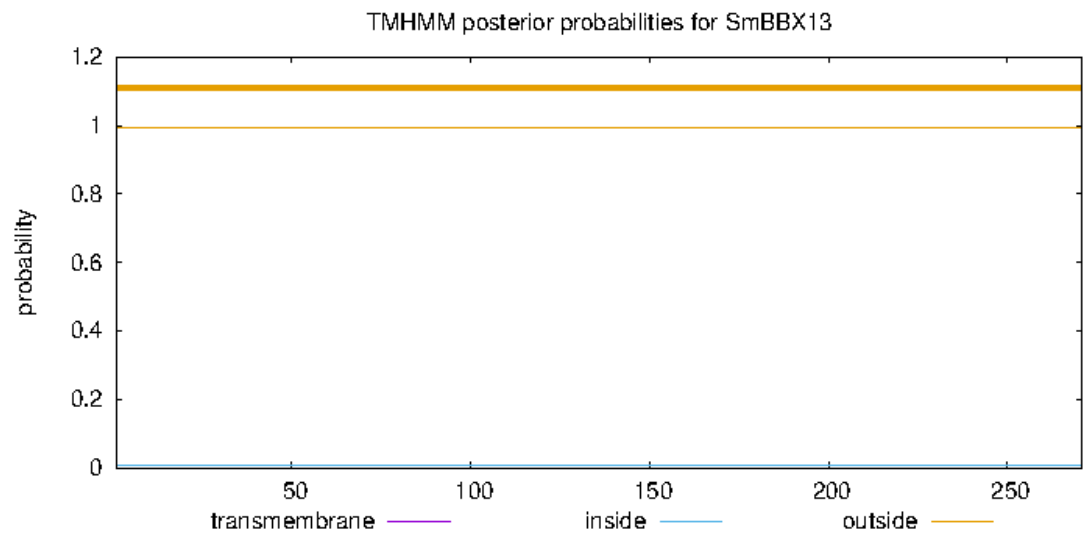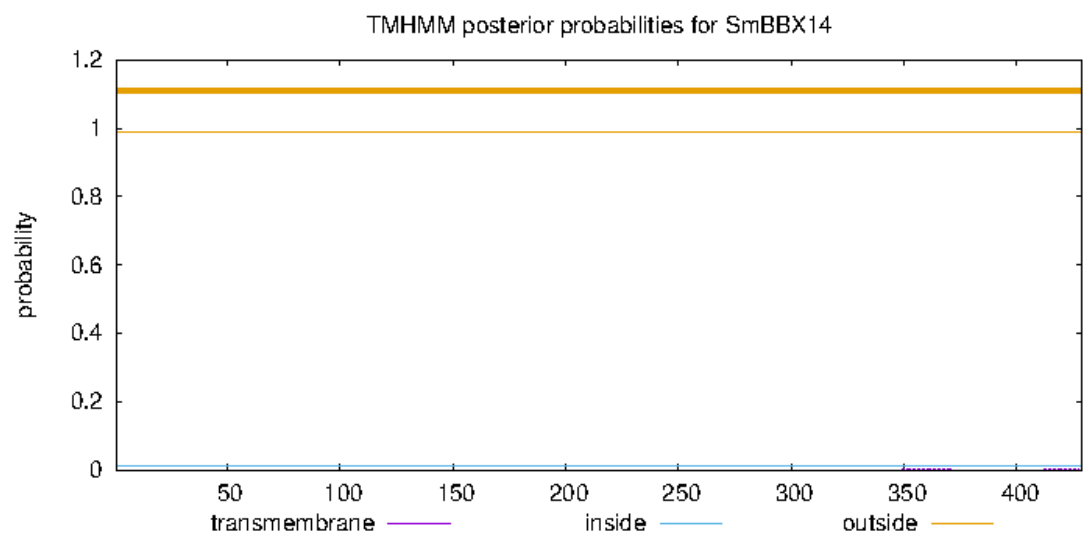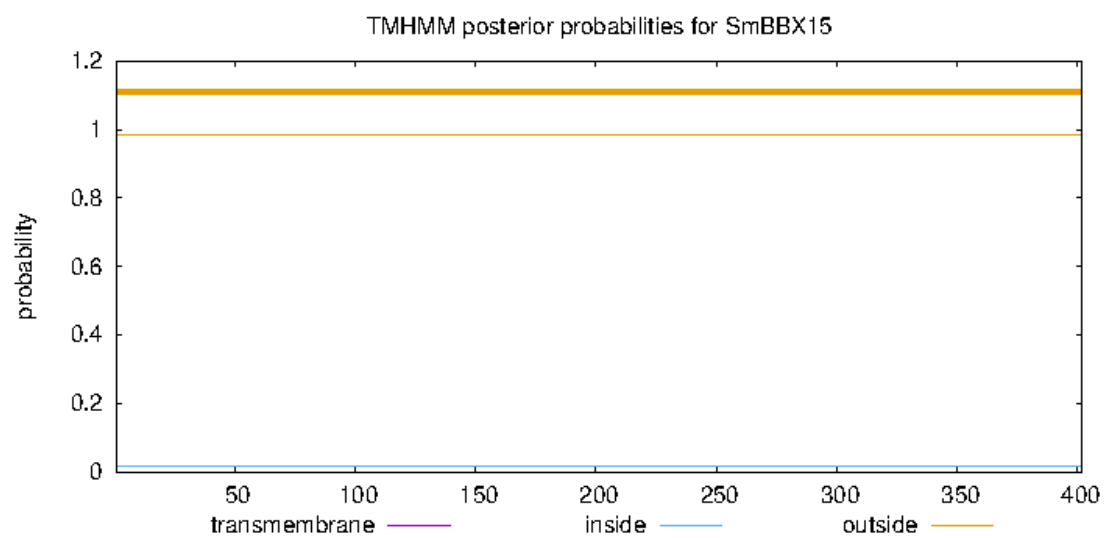

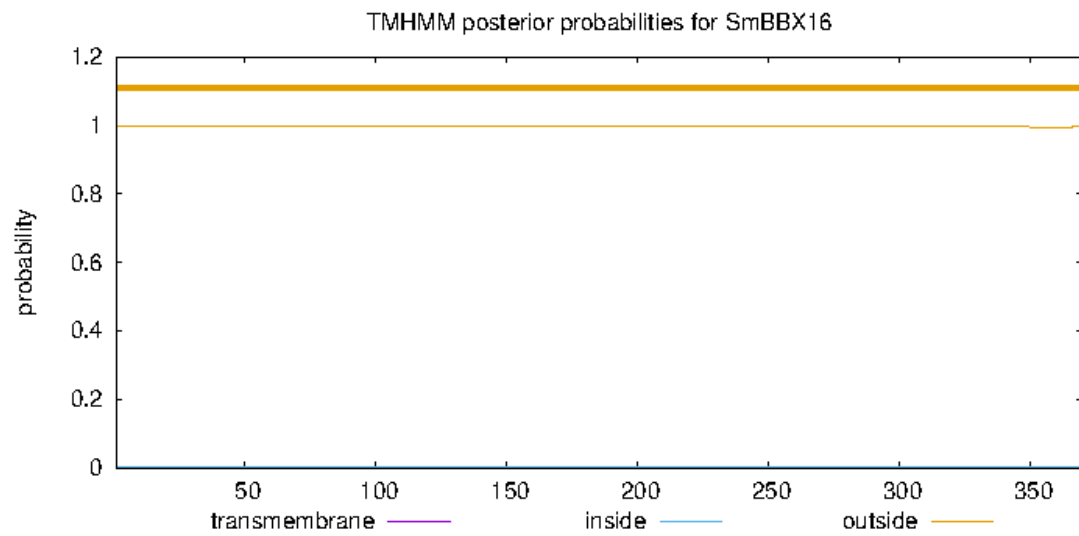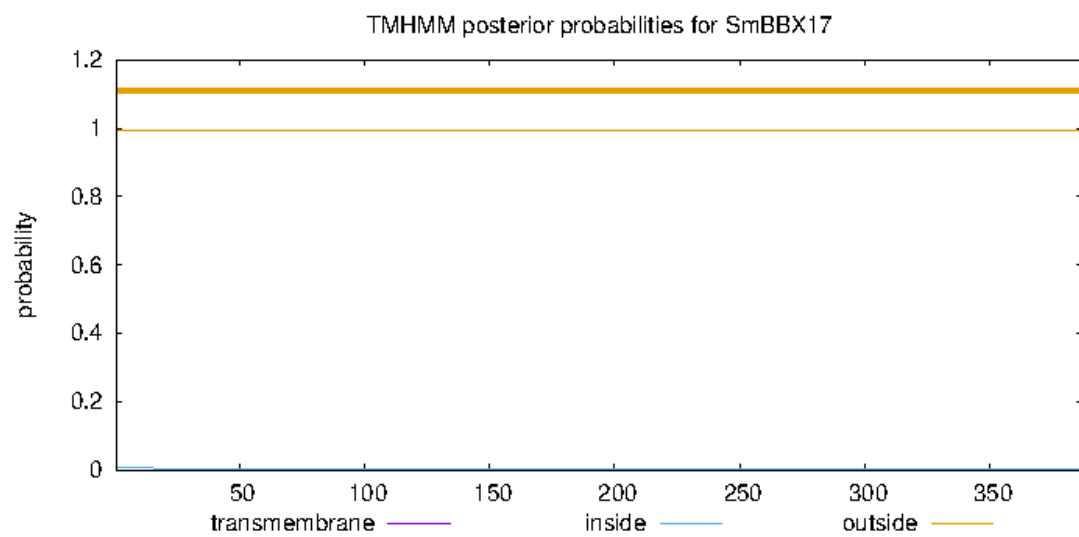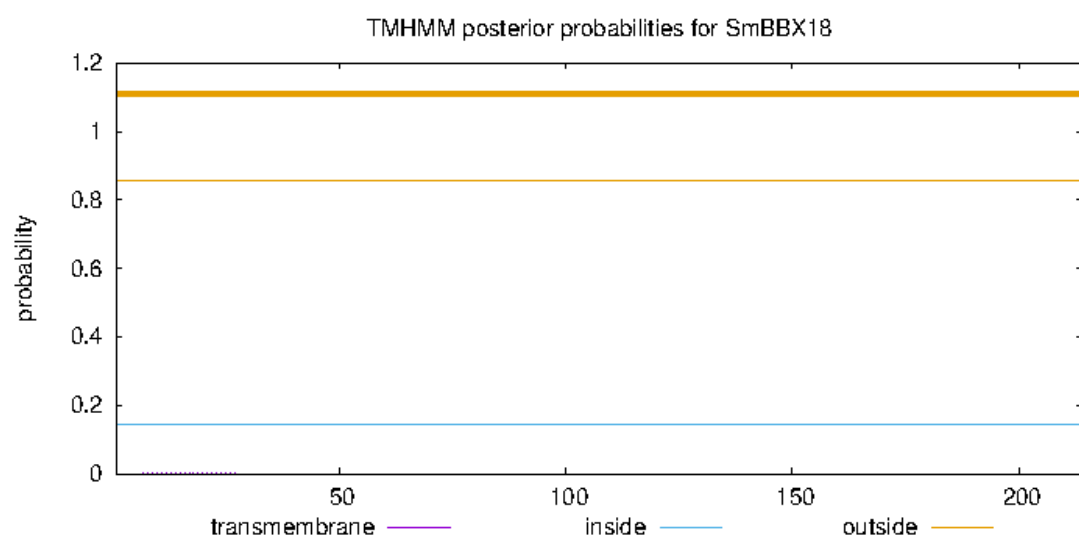

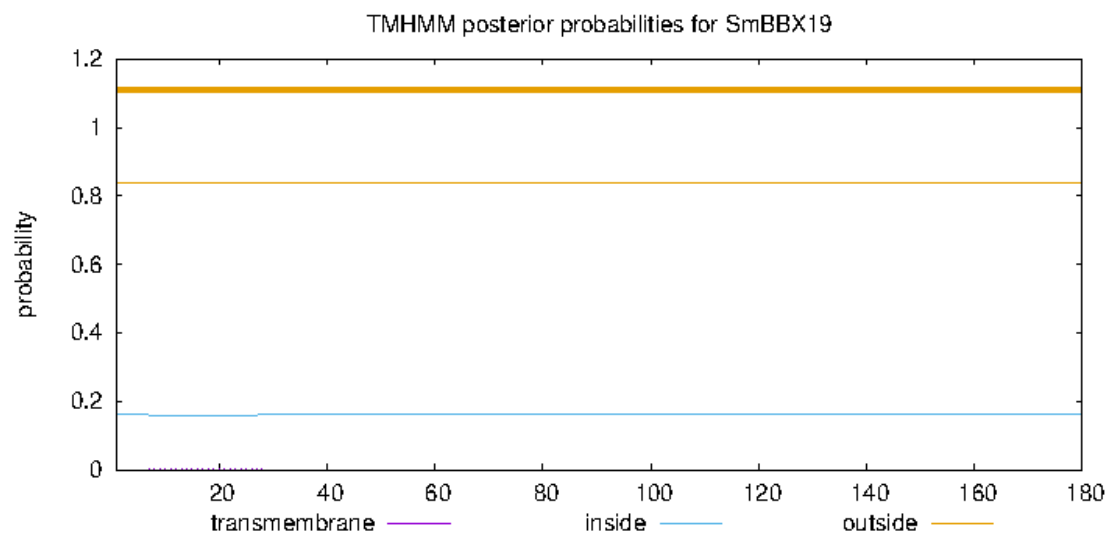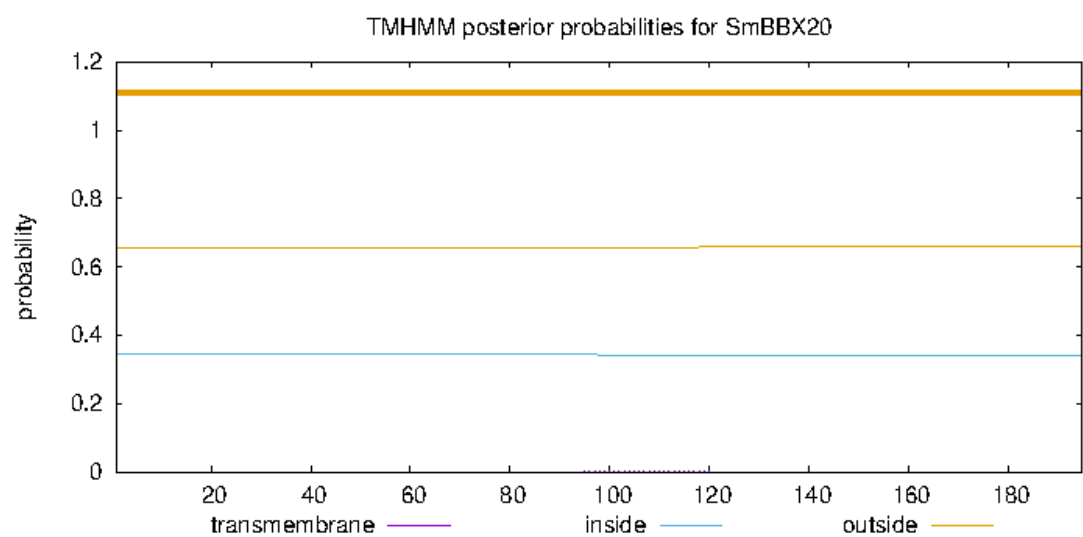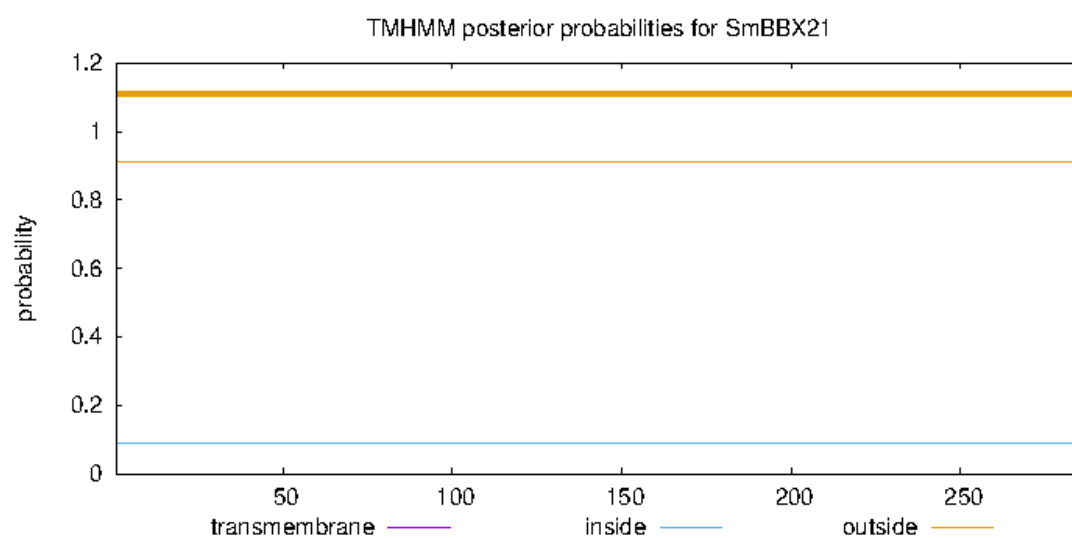

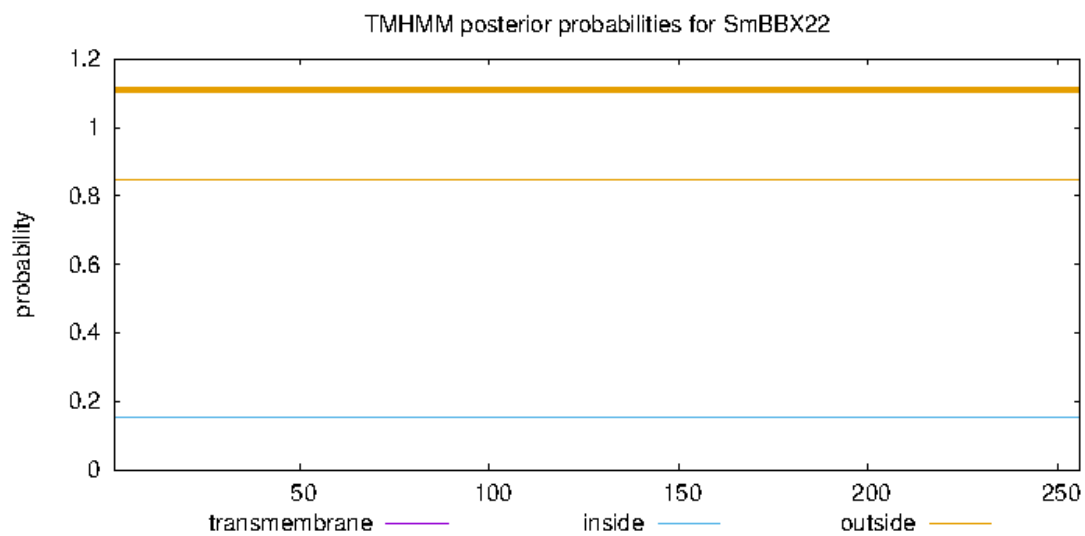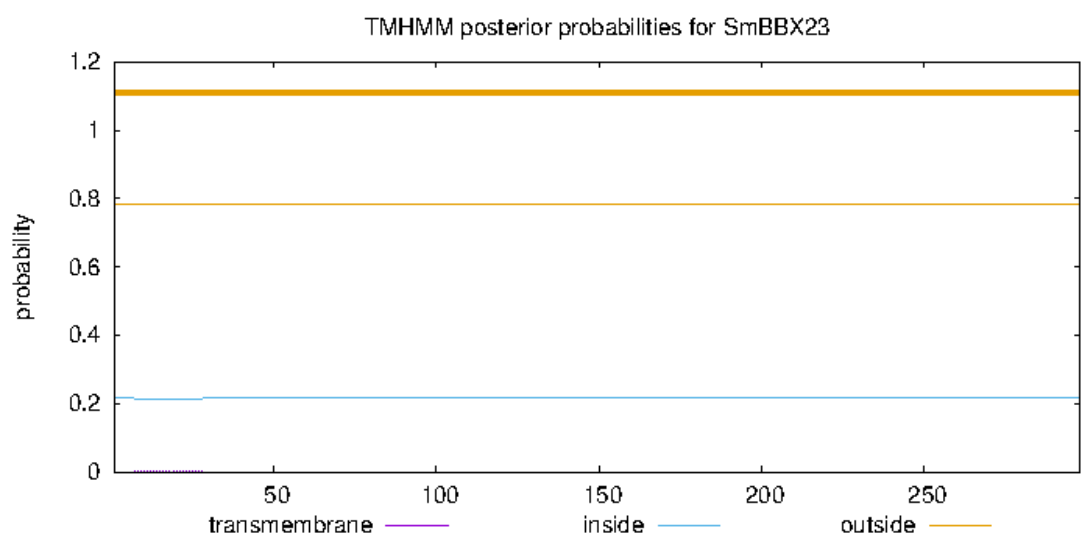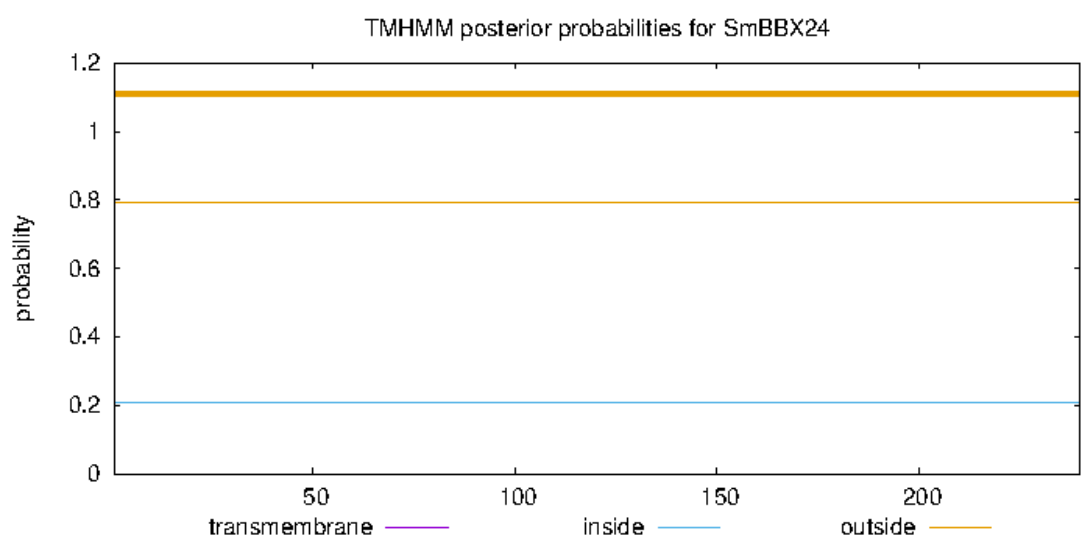



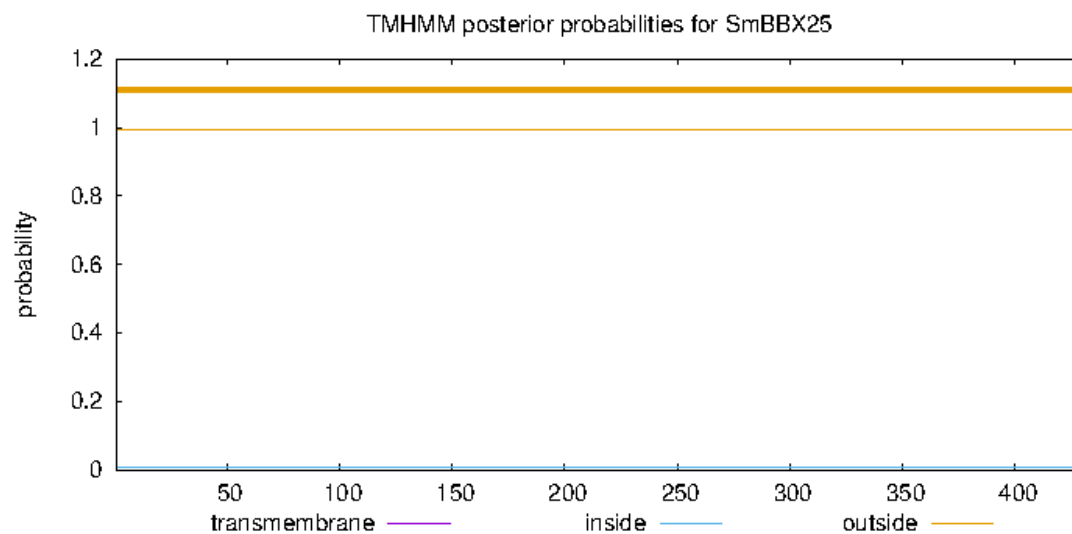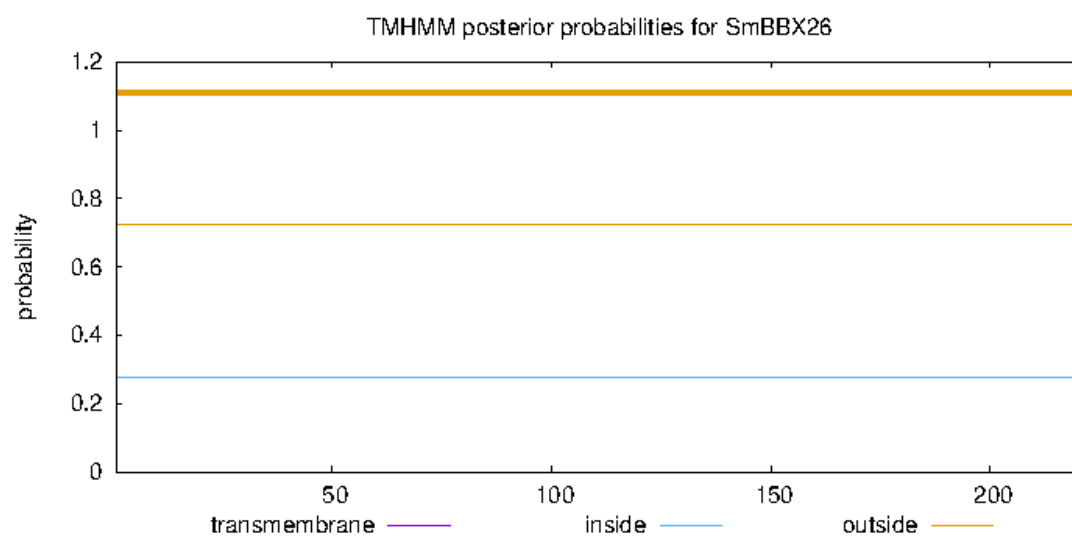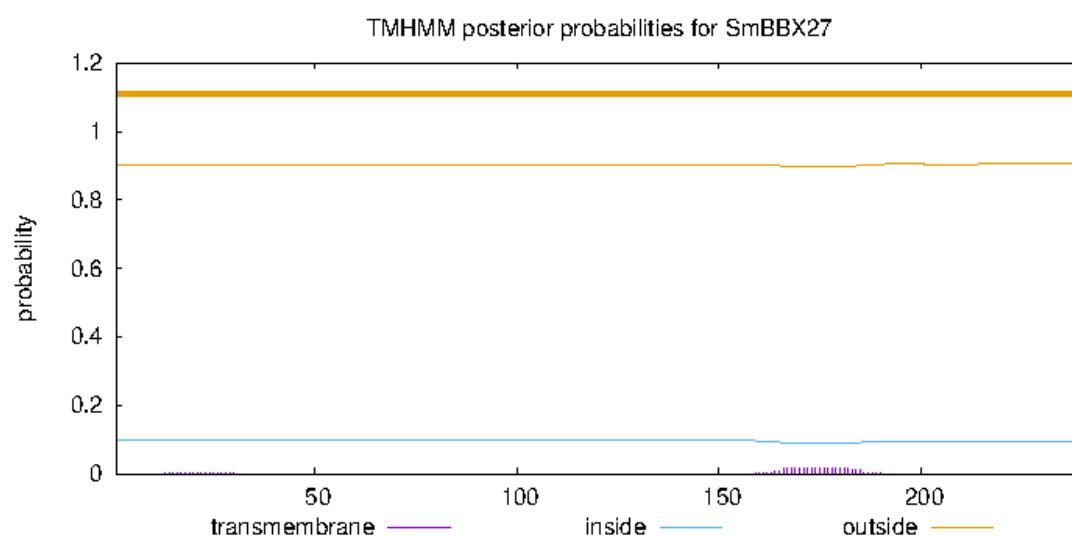

Supplement: s1 [file s1]
