# Supplementary material for: Genome-Wide Characterization of B-Box Gene Family in Salvia miltiorrhiza
Source: MDPI journal article supplement (doi:10.3390/ijms24032146), 2023-01-21

**Figure S1:** Results of signal peptides analysis of *Salvia miltiorrhiza* BBX gene family.

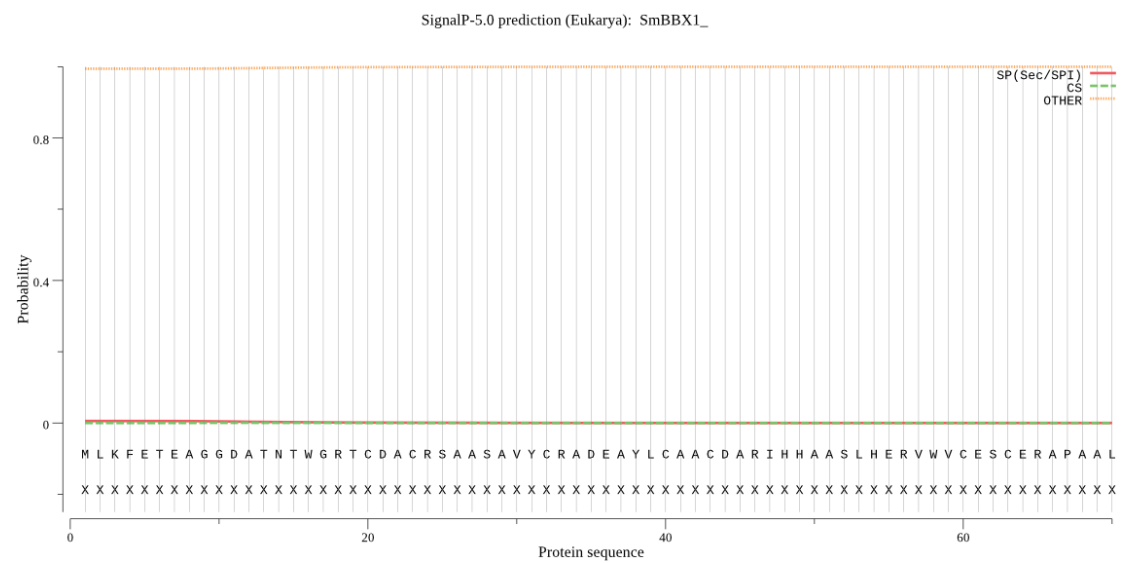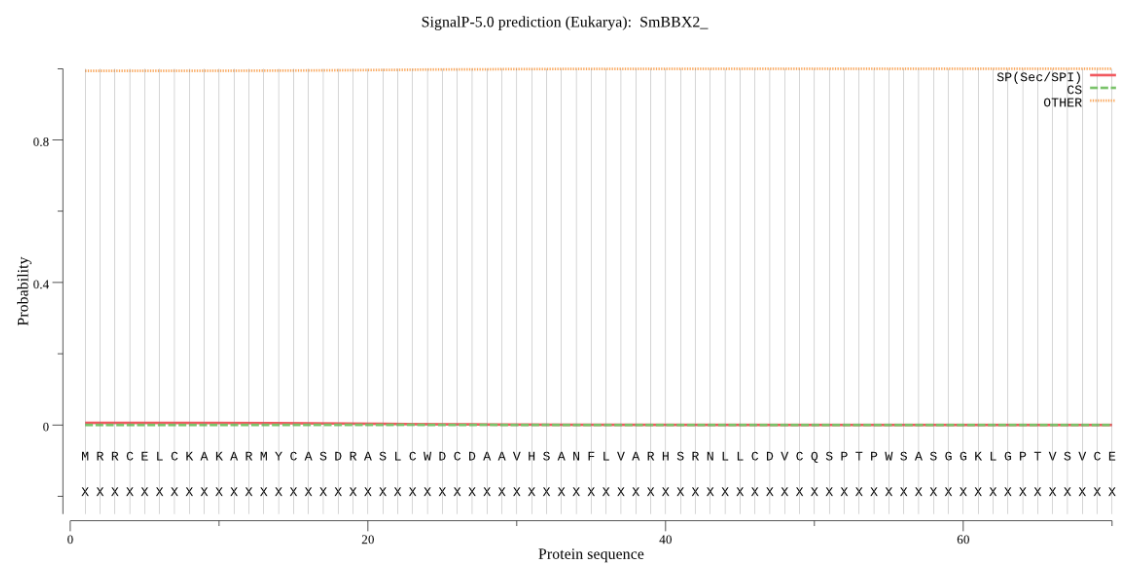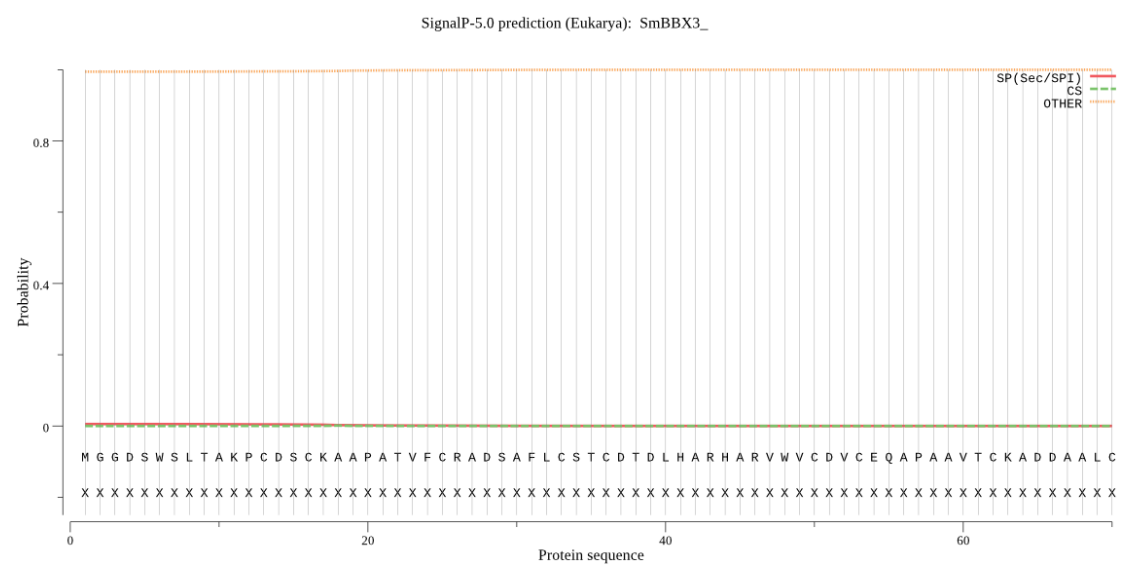

SignalP-5.0 prediction (Eukarya): SmBBX4\_

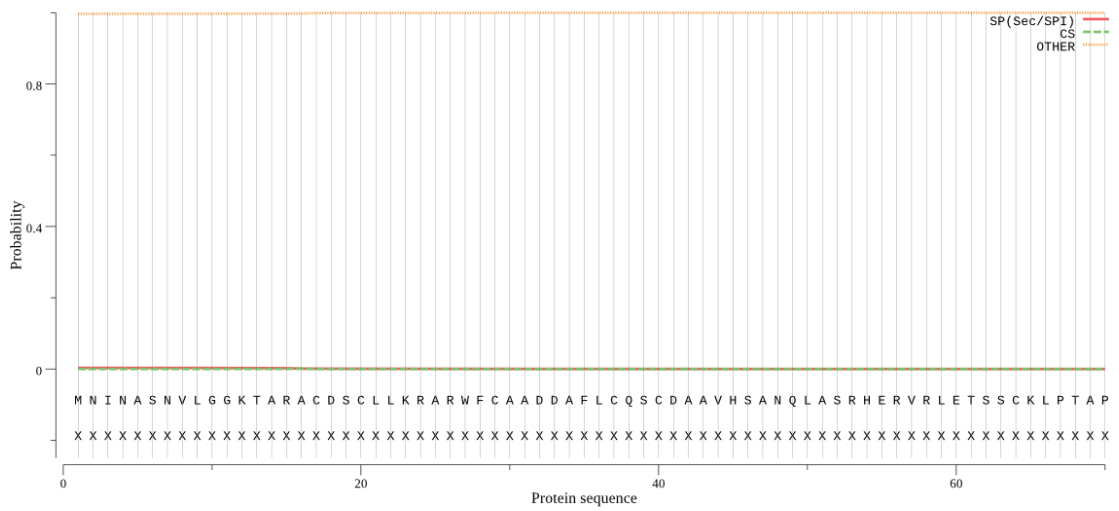

SignalP-5.0 prediction (Eukarya): SmBBX5\_

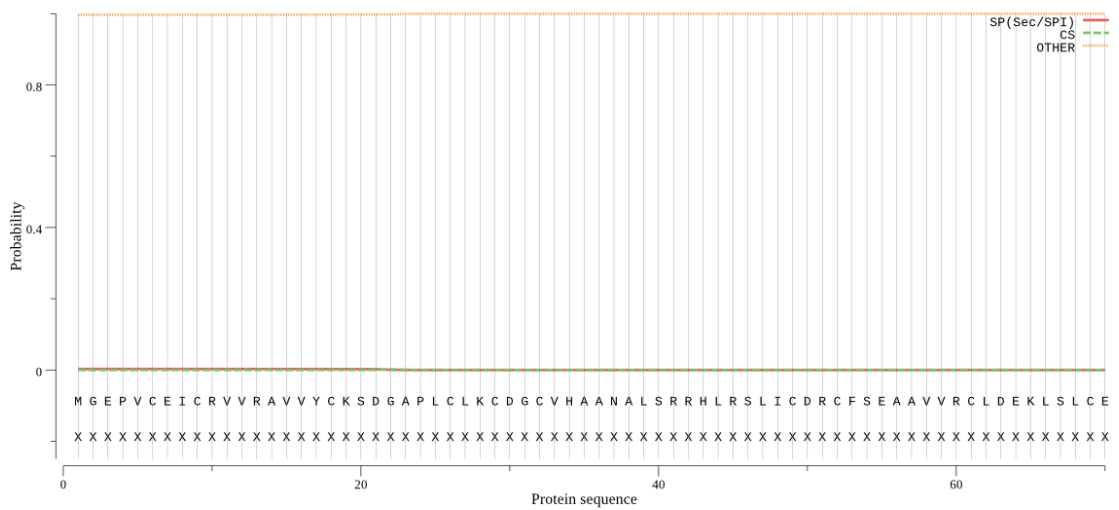

SignalP-5.0 prediction (Eukarya): SmBBX6\_

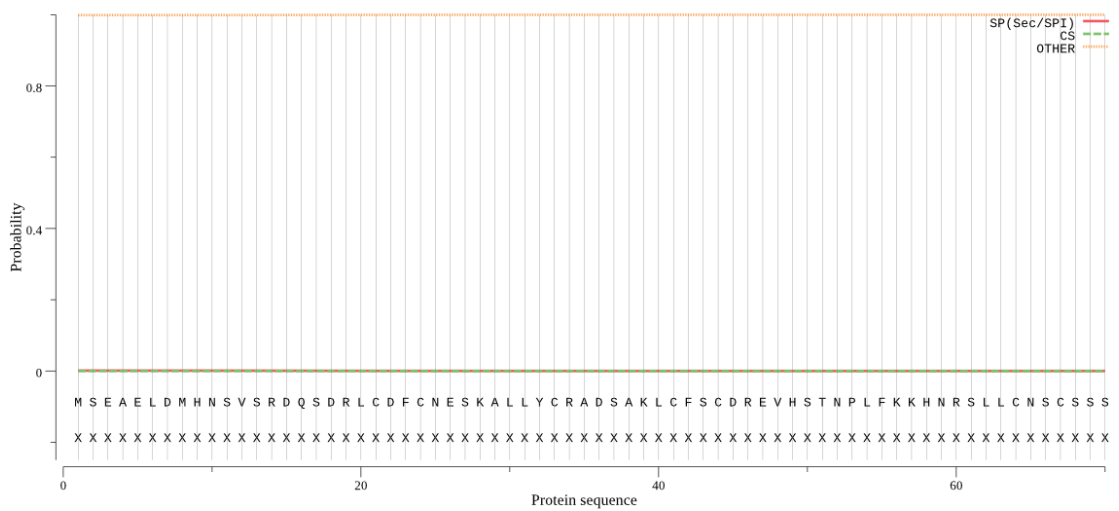

SignalP-5.0 prediction (Eukarya): SmBBX7\_

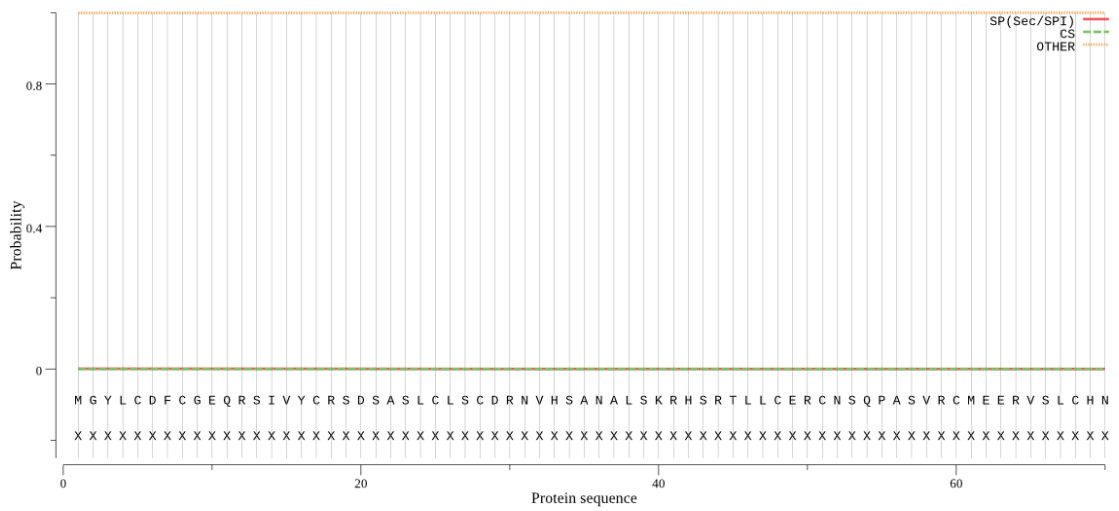

SignalP-5.0 prediction (Eukarya): SmBBX8\_

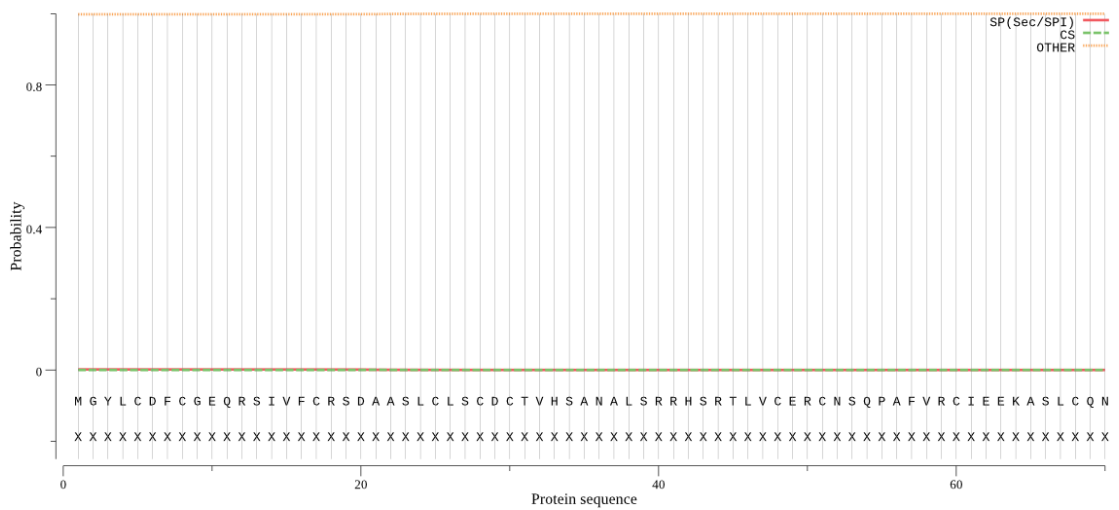

SignalP-5.0 prediction (Eukarya): SmBBX9\_

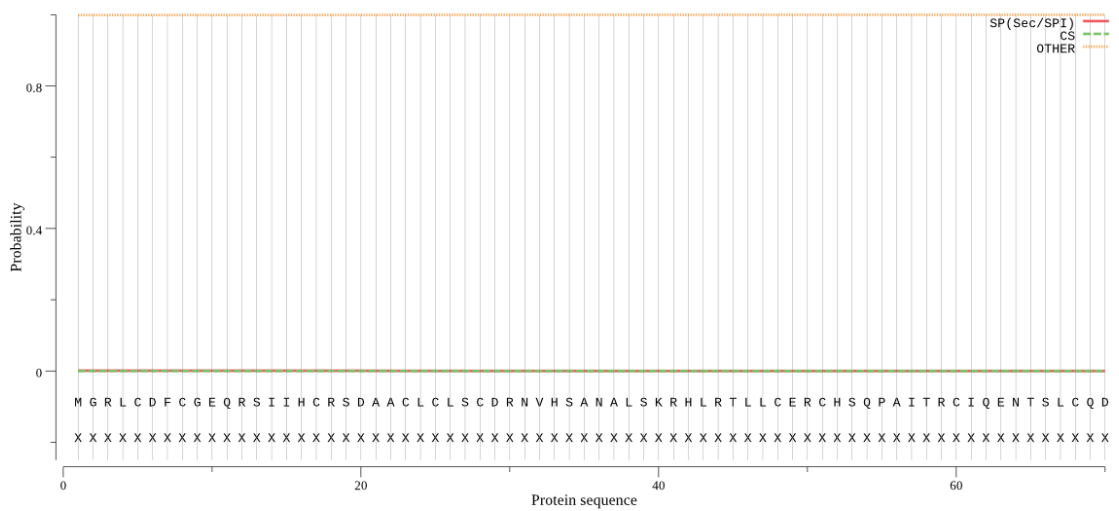

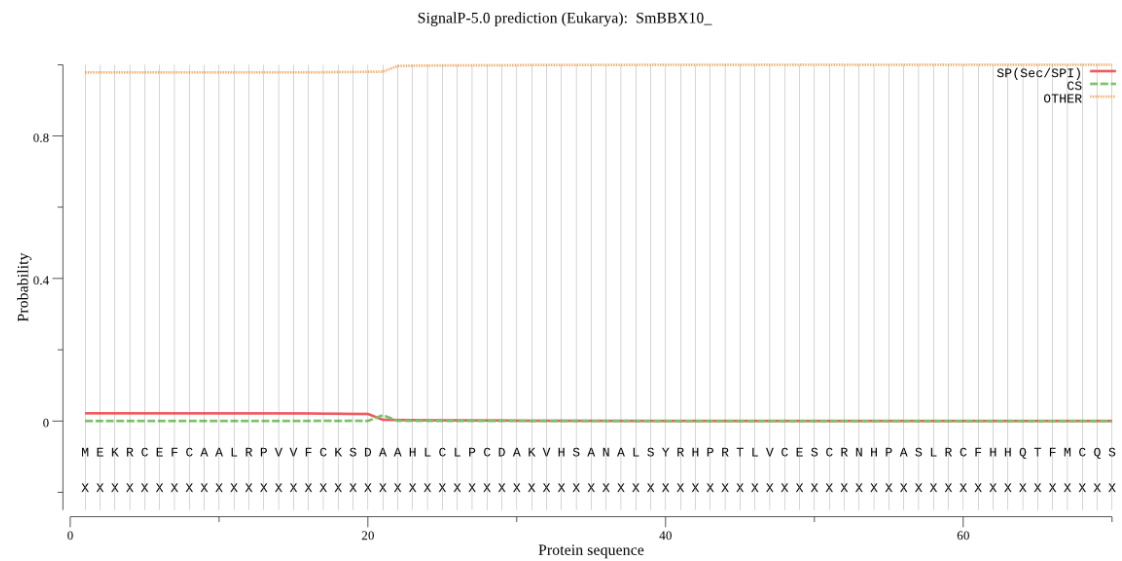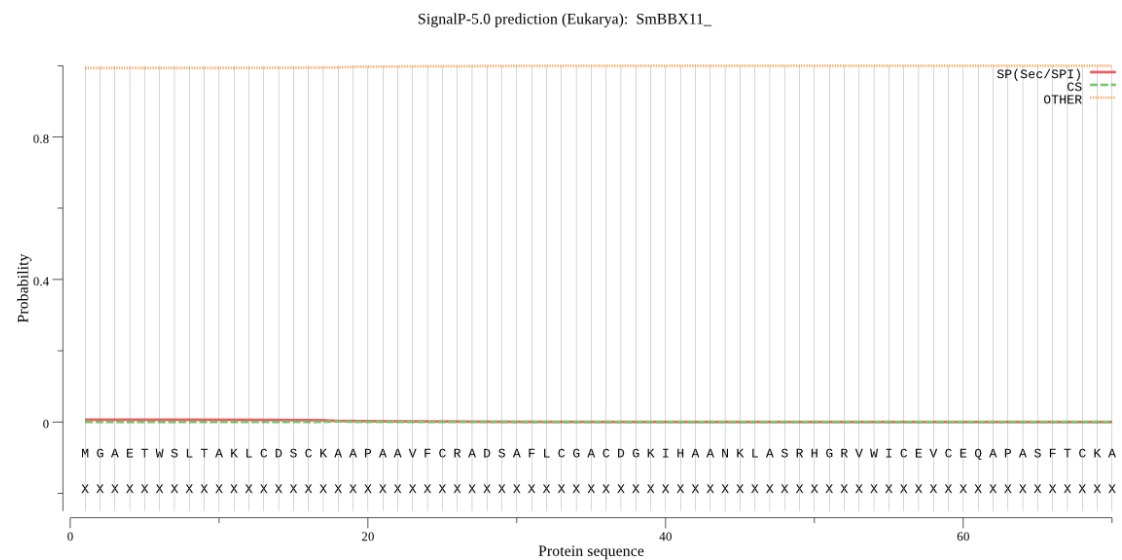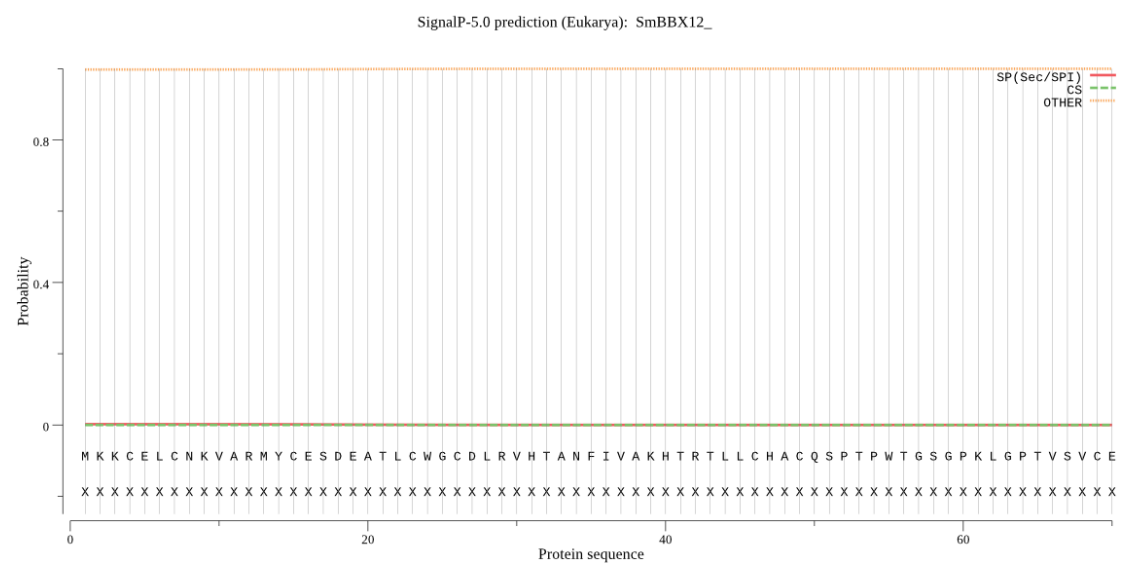

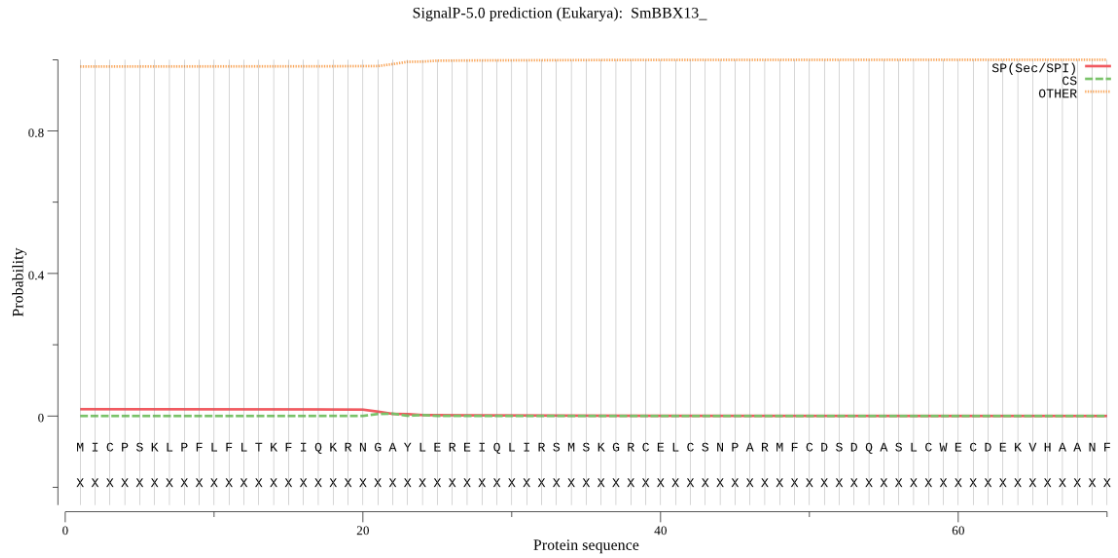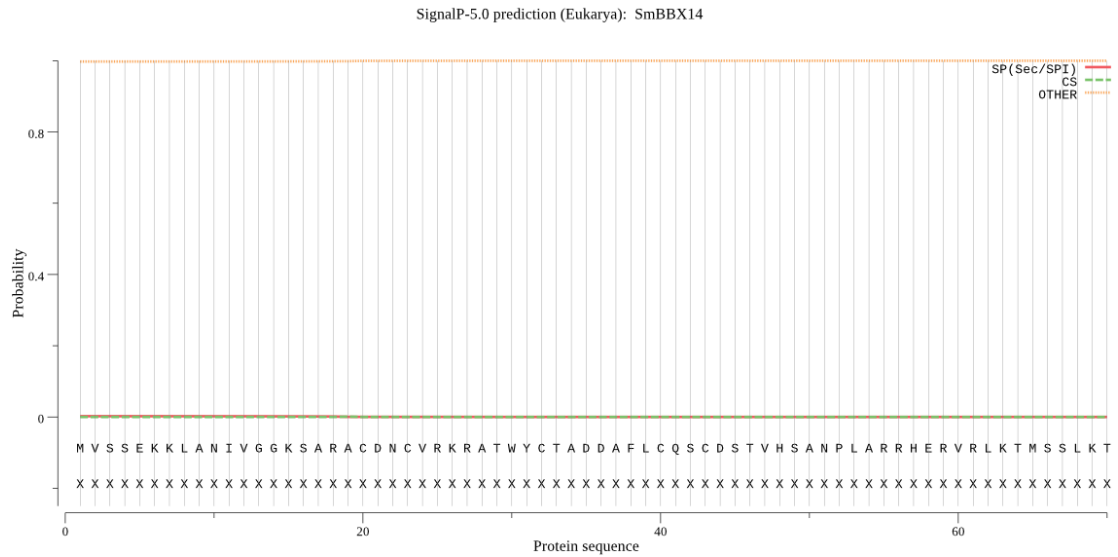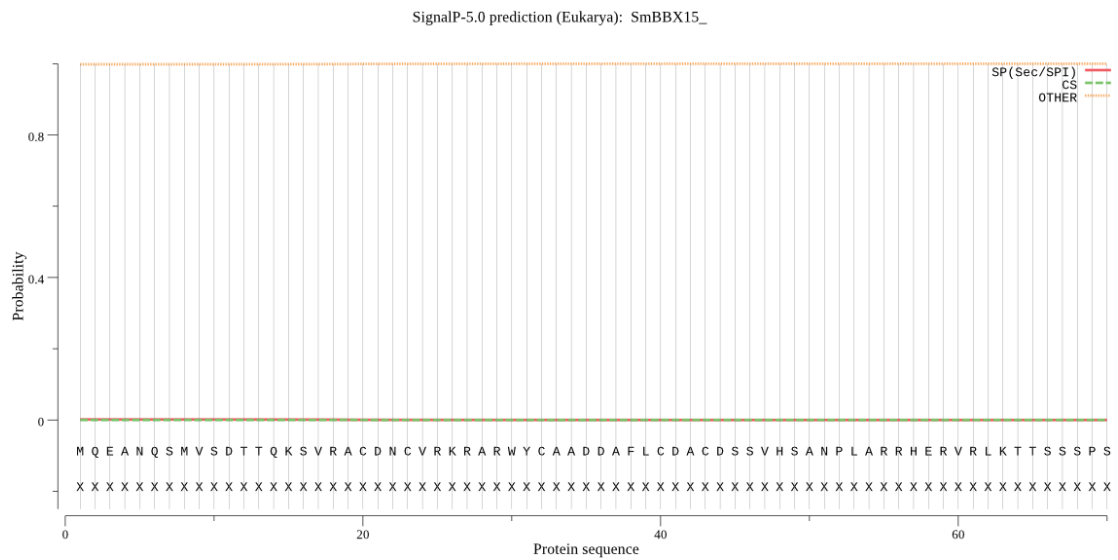

SignalP-5.0 prediction (Eukarya): SmBBX16\_

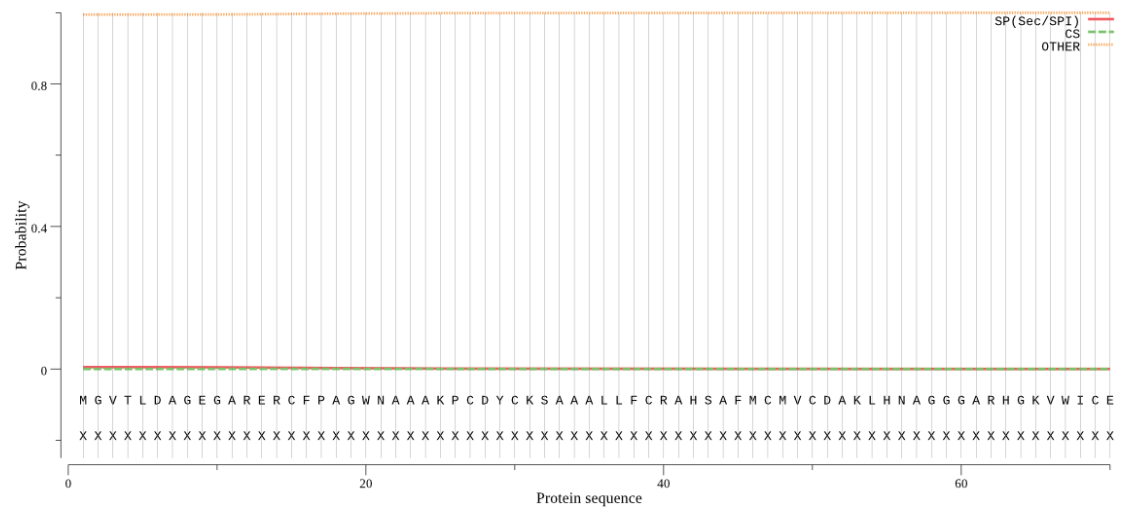

SignalP-5.0 prediction (Eukarya): SmBBX17

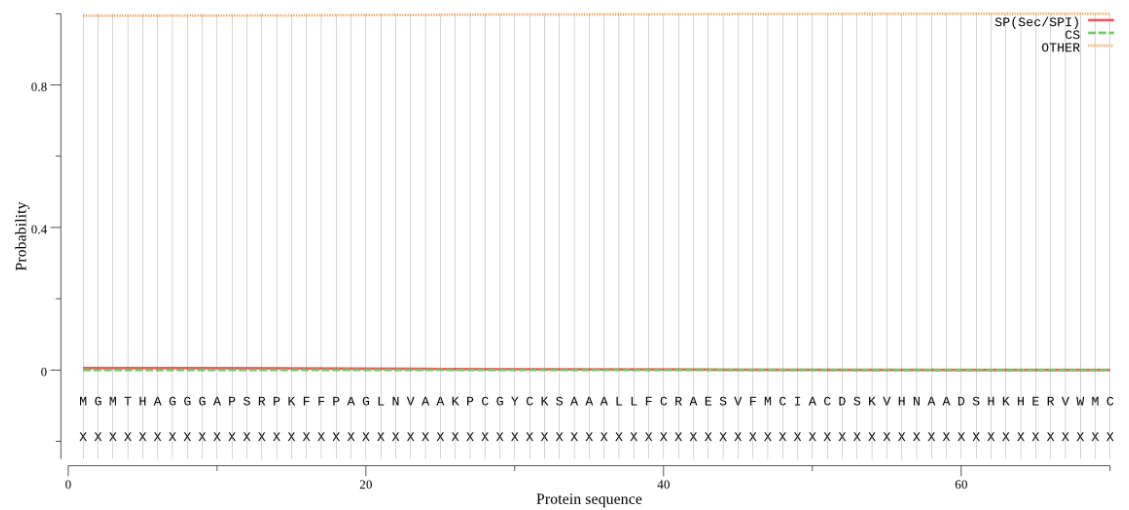

SignalP-5.0 prediction (Eukarya): SmBBX18\_

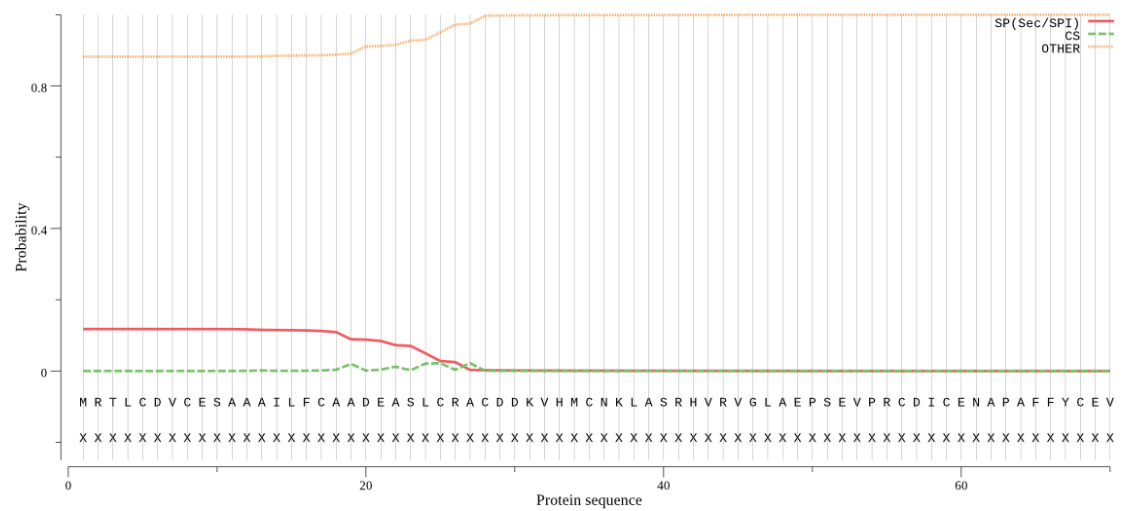

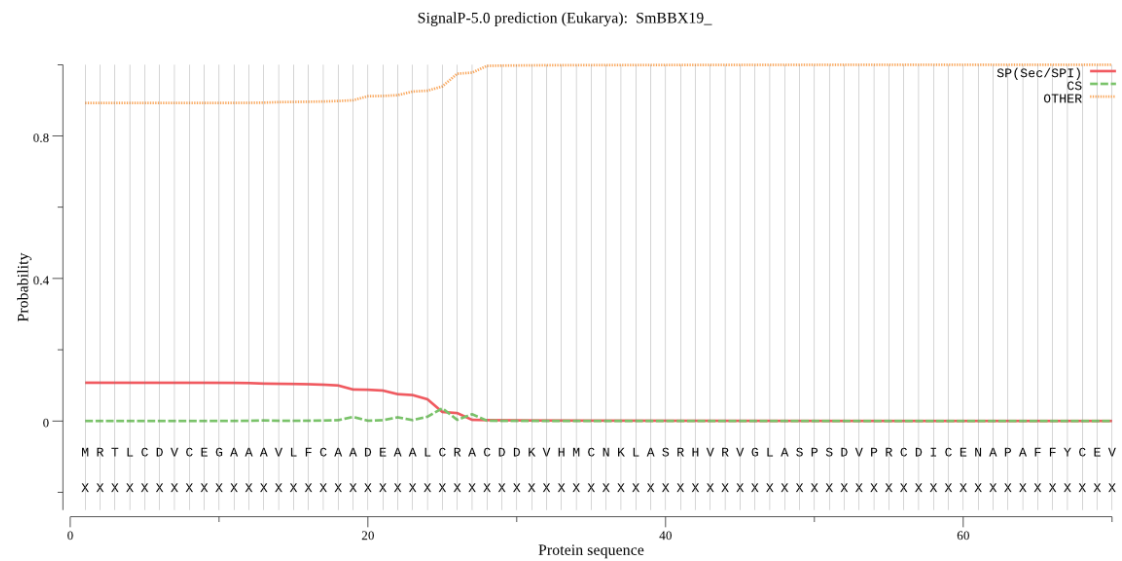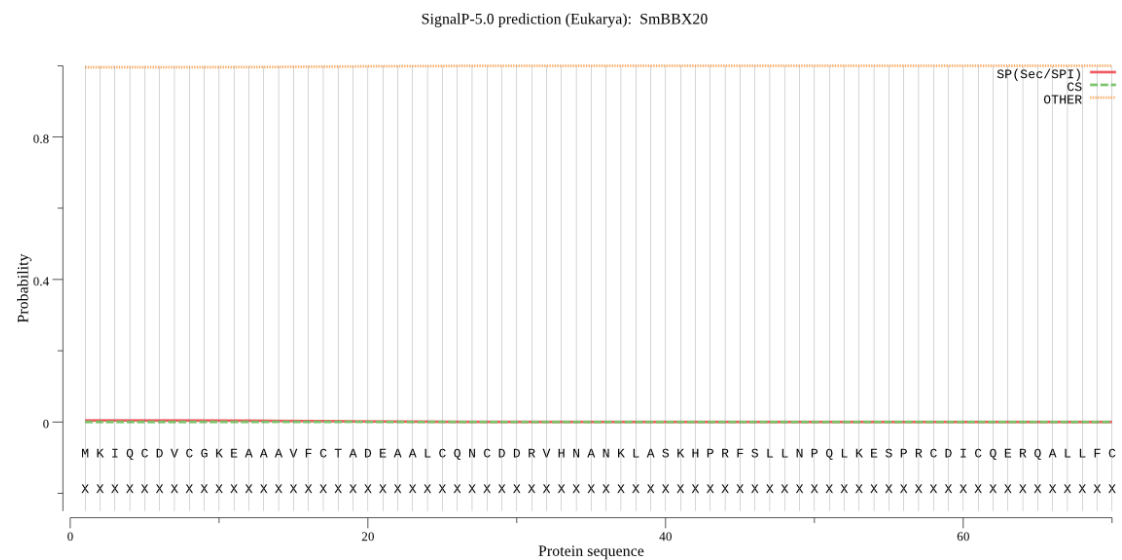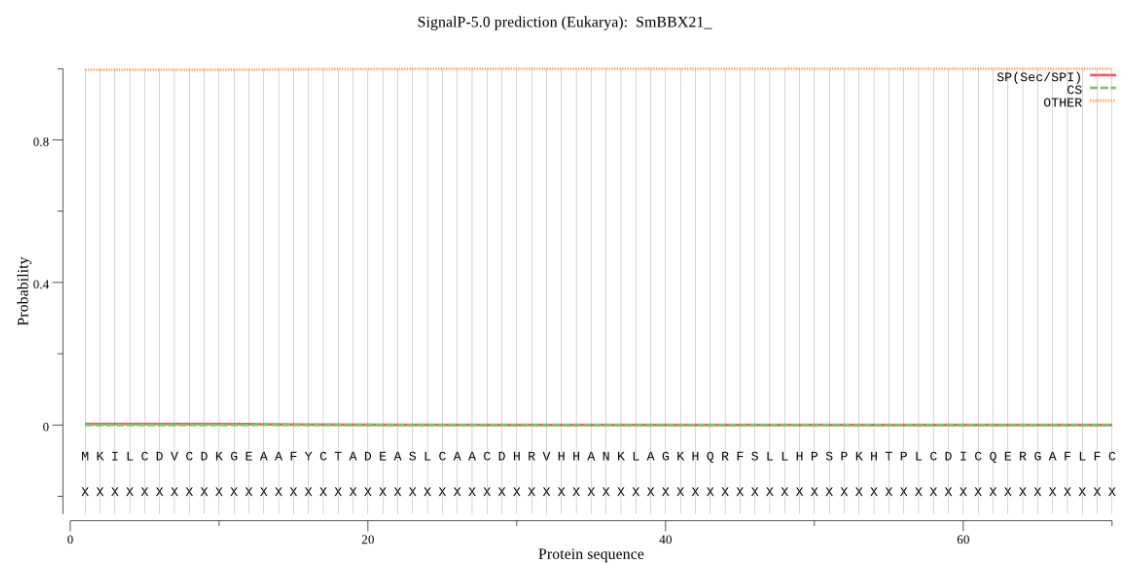

SignalP-5.0 prediction (Eukarya): SmBBX22

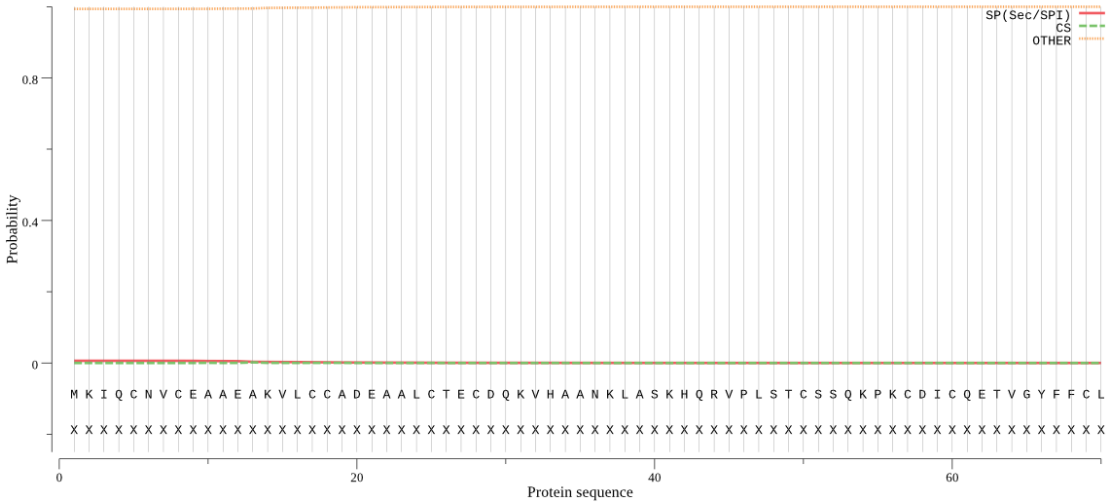

SignalP-5.0 prediction (Eukarya): SmBBX23\_

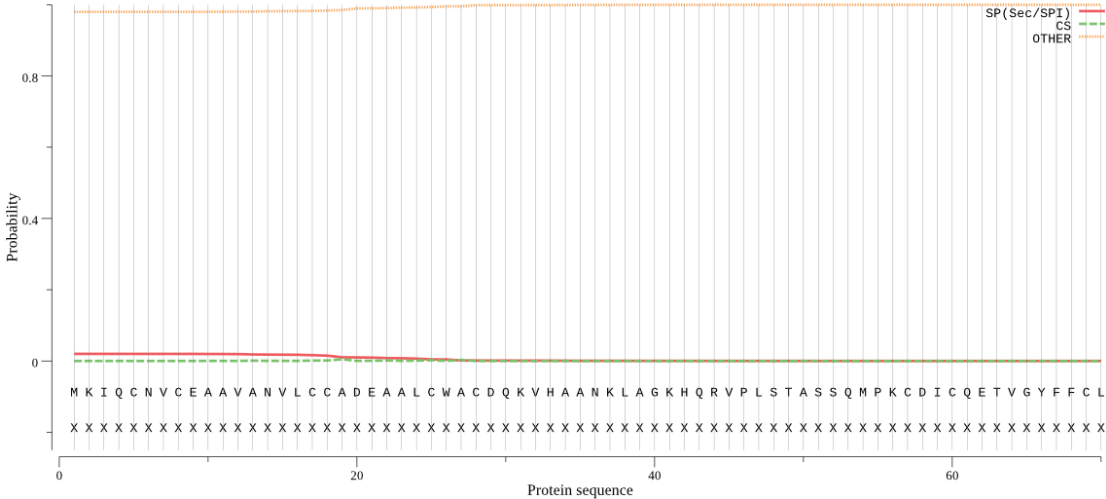

SignalP-5.0 prediction (Eukarya): SmBBX24

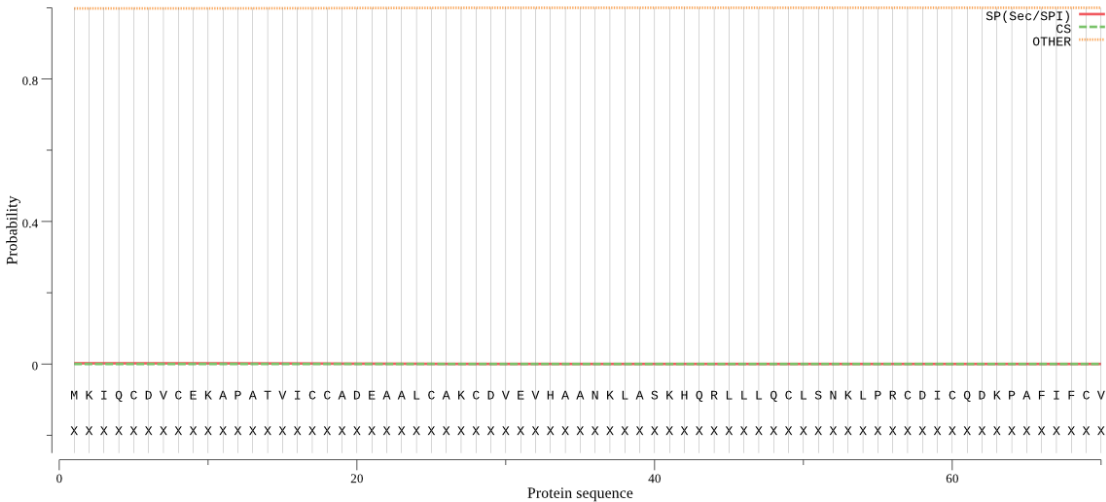



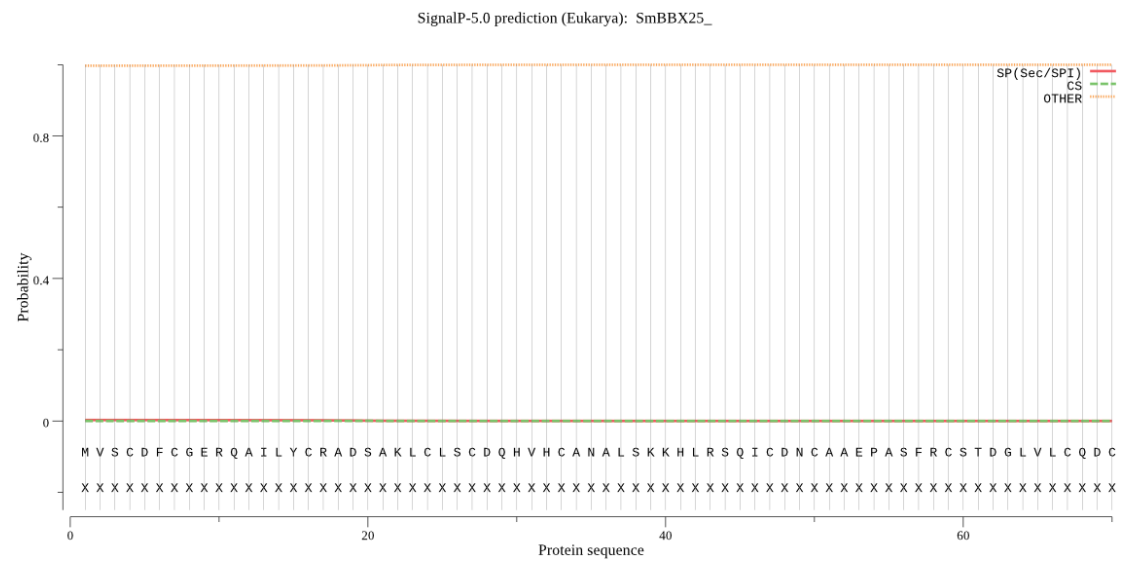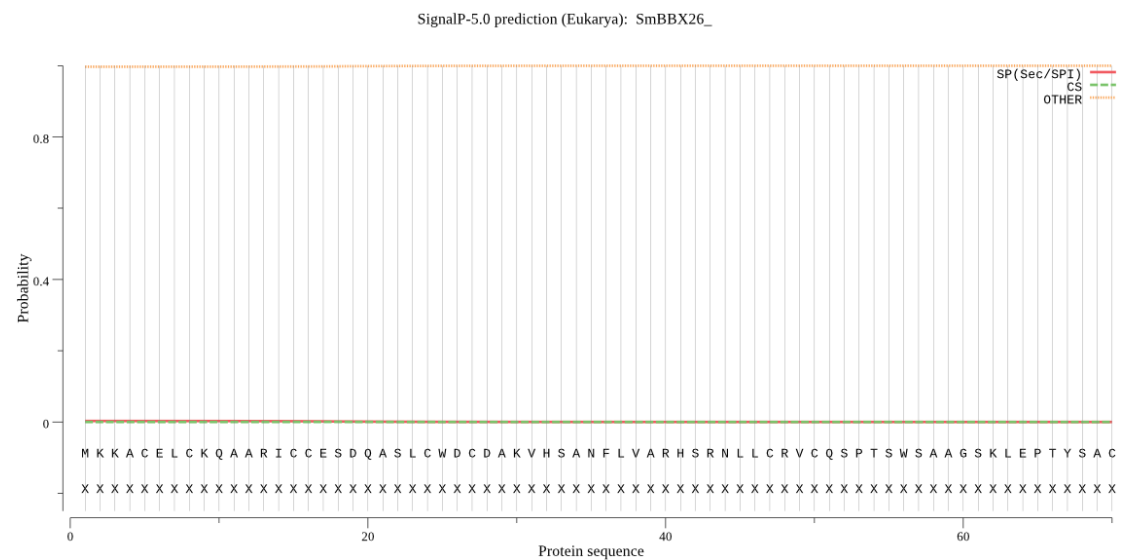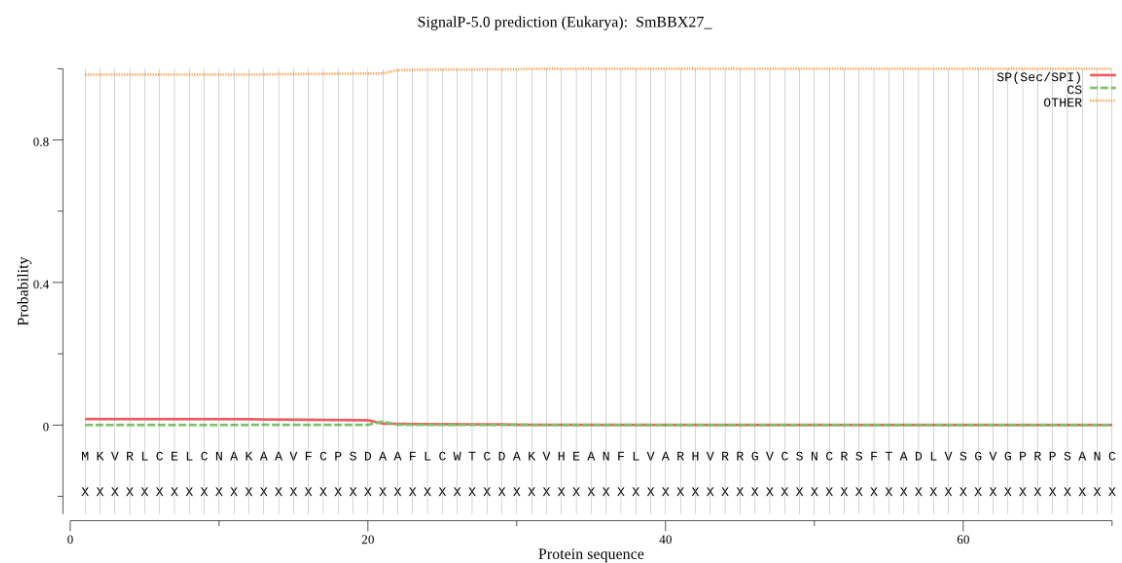

Supplement: s1 [file s1]
